# Supplementary material
Source: Elsevier journal article supplement (https://www.sciencedirect.com/science/article/pii/S2531043720302178)
Supplement: mmc1 [file S2531043720302178:mmc1.docx]

**Table S1. Delphi exercise – original results**

| **Topic** | **Item** | **Statements** | **Positive agreement** | **Negative agreement** | **N. answers** | **Round of consensus** |
| --- | --- | --- | --- | --- | --- | --- |
| 1 | 1 | A avaliação objetiva da não-adesão à terapêutica nos doentes com asma não controlada e a otimização da adesão à terapêutica, são de importância fulcral para o correto diagnóstico de asma grave. | 100.0% | 0.0% | 48 | 1st |
| 1 | 2 | O diagnóstico diferencial, a identificação das comorbilidades que interferem no controlo da asma e a otimização do tratamento das mesmas, são de suma importância para o correto diagnóstico de asma grave. | 100.0% | 0.0% | 48 | 1st |
| 1 | 3 | A terapêutica inalada na asma grave deve estar maximizada. | 100.0% | 0.0% | 48 | 1st |
| 1 | 4 | O tratamento da asma grave deve ser orientado por critérios clínicos, juntamente com a avaliação dos mecanismos envolvidos na doença (com auxílio de marcadores como, por exemplo, contagem de eosinófilos no sangue periférico, IgE total sérica, testes de sensibilidade cutânea, fração de óxido nítrico no ar exalado e contagem de células na expetoração induzida). | 97.9% | 2.1% | 48 | 1st |
| 1 | 5 | Até ao momento, a terapêutica crónica de manutenção com corticosteroides sistémicos na asma grave tem sido evitada | 65.2% | 32.6% | 46 | Not reached |
| 1 | 6 | Até ao momento, o risco cumulativo da corticoterapia sistémica nas agudizações não tem sido devidamente valorizado. | 87.0% | 8.7% | 46 | 2nd |
| 1 | 7 | Os corticoides sistémicos (CS) podem ser usados nas agudizações moderadas a graves de asma, mas NÃO como primeira linha para gestão terapêutica da asma grave a longo prazo. | 95.8% | 0.0% | 48 | 1st |
| 1 | 8 | A corticoterapia sistémica crónica é uma das terapias adjuvantes para a asma grave. | 89.1% | 10.9% | 46 | 3rd |
| 1 | 9 | A exposição contínua aos corticoides sistémicos está significativamente associada a um aumento do risco de eventos adversos tais como infecções, complicações cardiovasculares, metabólicas, psiquiátricas, oculares, gastrointestinais e ósseas. | 100.0% | 0.0% | 48 | 1st |
| 1 | 10 | A exposição aos corticoides sistémicos, mesmo que por curtos períodos, .i.e., sem ser em utilização crónica, está associada a um aumento do risco de eventos adversos tais como, infecções, complicações cardiovasculares, metabólicas, psiquiátricas, oculares, gastrointestinais e ósseas. | 91.3% | 2.2% | 46 | 2nd |
| 1 | 11 | Os agentes biológicos, que permitem reduzir a utilização de CSC, devem ser preferidos como terapêutica adjuvante em doentes com asma grave, sempre que os doentes sejam elegíveis para estes agentes. | 100.0% | 0.0% | 48 | 1st |
| 1 | 12 | Ao doente asmático, já dependente de corticosteroides sistémicos (CS), deve propor-se terapêutica com agentes biológicos, sempre que seja elegível para tal. | 97.9% | 0.0% | 48 | 1st |
| 1 | 13 | Um valor de FeNO superior a 20 ppb e/ou de eosinófilos no sangue periférico superior a 150 céls/microL sugere inflamação tipo 2. | 91.3% | 4.3% | 46 | 2nd |
| 1 | 14 | Asmáticos sob CSC ou sob corticoterapia inalada de alta dose podem ter frenados os sinais de inflamação tipo 2. | 95.7% | 0.0% | 46 | 3rd |
| 1 | 15 | Mesmo com a disponibilidade dos novos agentes biológicos, uma proporção de doentes continuará a necessitar de CSC para controlar a asma grave. | 91.3% | 4.3% | 46 | 3rd |
| 1 | 16 | Um doente com asma grave, com mais de 2 agudizações graves tratadas com CS, ou 1 hospitalização por asma no último ano, deve ser tratado com biológico, se elegível. | 91.7% | 0.0% | 48 | 1st |
| 1 | 17 | Em doentes com critérios para biológicos não se deve iniciar CSC dado o risco de incorrerem em complicações inerentes à corticoterapia sistémica. | 82.6% | 17.4% | 46 | 3rd |
| 1 | 18 | Nos doentes com asma grave não controlada que não são elegíveis para agentes biológicos (por exemplo: asma não tipo 2) pode tentar-se o controlo com uso de corticoterapia sistémica. | 89.1% | 2.2% | 46 | 3rd |
| 2 | 19 | Nos doentes com asma grave não controlada que não são elegíveis para agentes biológicos e em que se tenta o controlo com corticoterapia sistémica crónica, a sua efectividade terapêutica deve ser avaliada após um período de tempo entre 3 a 6 meses. Essa avaliação deve ser feita com base na alteração dos outcomes previamente definidos para determinado doente. | 93.8% | 4.2% | 48 | 1st |
| 2 | 20 | A dose de CSC a utilizar deve ser a mínima necessária para obter o melhor controlo da doença. | 100.0% | 0.0% | 48 | 1st |
| 2 | 21 | O entendimento sobre o melhor controlo da doença deve ser pré-definido com o doente, nos vários parâmetros a considerar, tais como agudizações, sintomas, qualidade de vida, função respiratória ou efeitos secundários da terapêutica. | 95.8% | 2.1% | 48 | 1st |
| 2 | 22 | Consideram-se doses baixas de CSC, doses até 5 mg de prednisolona id ou equivalente. | 82.6% | 6.5% | 46 | 3rd |
| 2 | 23 | Consideram-se doses elevadas de CSC, doses superiores a 5 mg de prednisolona id ou equivalente. | 69.6% | 13.0% | 46 | Not reached |
| 2 | 24 | A resistência ou insensibilidade aos corticosteroides que pode acontecer na asma grave, deve-se a uma multiplicidade de fatores. | 91.3% | 2.2% | 46 | 2nd |
| 2 | 25 | No contexto de insensibilidade a corticosteroides, o tratamento com CS pode só ser eficaz em doses mais altas. | 87.0% | 8.7% | 46 | 3rd |
| 2 | 26 | Em asmáticos graves não controlados, a dose máxima diária prescrita de CSC deve ser a mínima necessária para melhorar os sintomas e reduzir as agudizações anuais. | 93.8% | 4.2% | 48 | 1st |
| 2 | 27 | Na titulação de dose de CSC para controlo da asma grave, não deve ser ultrapassado o máximo de 40 mg prednisolona, ou equivalente id, já que, provavelmente, não haverá benefício em doses superiores. | 87.0% | 6.5% | 46 | 3rd |
| 2 | 28 | Na presença de efeitos secundários importantes e causadores de prejuízo grave, deve reduzir-se a dose de CSC, ainda que com algum agravamento aceitável do controlo da asma, desde que NÃO SE TRADUZA EM MAIS AGUDIZAÇÕES. | 89.1% | 4.3% | 46 | 2nd |
| 2 | 29 | Na presença de efeitos secundários importantes e causadores de prejuízo grave, deve reduzir-se a dose de CSC, ainda que com algum agravamento aceitável do controlo da asma, desde que NÃO SE TRADUZA EM AGRAVAMENTO DE SINTOMAS. | 89.1% | 10.9% | 46 | 3rd |
| 2 | 30 | Na presença de efeitos secundários importantes e causadores de prejuízo grave, deve reduzir-se a dose de CSC, ainda que com algum agravamento aceitável de controlo da asma, desde que NÃO SE TRADUZA EM DETERIORAÇÃO DA QUALIDADE DE VIDA. | 88.9% | 11.1% | 45 | 3rd |
| 2 | 31 | Na presença de efeitos secundários importantes e causadores de prejuízo grave, deve reduzir-se a dose de CSC, ainda que com algum agravamento aceitável do controlo da asma, desde que NÃO SE TRADUZA EM DECLÍNIO DA FUNÇÃO PULMONAR. | 76.1% | 19.6% | 46 | Not reached |
| 2 | 32 | Na asma grave, não há necessidade de escalonamento da dose de CSC. | 2.2% | 87.0% | 46 | 3rd |
| 2 | 33 | A monitorização de biomarcadores de inflamação (por exemplo: óxido nítrico exalado, contagem de eosinófilos no sangue periférico) é útil para titular a dose de CSC a longo prazo. | 37.0% | 19.6% | 46 | Not reached |
| 2 | 34 | Em doentes com capacidade de autogestão da asma, perante uma agudização, o início atempado de terapêutica com um ciclo curto de CS é habitualmente eficaz na evicção da progressão da agudização e na redução de sintomas. | 93.5% | 6.5% | 46 | 2nd |
| 2 | 35 | A redução da dose de CSC deve ser realizada sob a supervisão direta de um especialista na patologia. | 91.3% | 6.5% | 46 | 2nd |
| 2 | 36 | A interrupção abrupta da corticoterapia sistémica crónica não é recomendada. | 93.8% | 2.1% | 48 | 1st |
| 2 | 37 | Diminuir progressivamente a dose de CSC evita agudizações, por se conseguir titular a dose mínima necessária. | 89.1% | 2.2% | 46 | 3rd |
| 2 | 38 | Em doentes estáveis medicados com altas doses de ICS/LABA e corticoides orais, recomenda-se a redução da dose de CSC. | 95.8% | 2.1% | 48 | 1st |
| 2 | 39 | As injeções intramusculares de corticosteroides de libertação lenta são tão eficazes quanto os CSC orais na prevenção de agudizações de asma. | 21.7% | 69.6% | 46 | Not reached |
| 2 | 40 | A dose administrada de corticoides sistémicos de libertação lenta é, na maioria das vezes, superior à necessária para controlar a agudização. | 89.1% | 6.5% | 46 | 2nd |
| 2 | 41 | O uso de corticoides injetáveis de libertação lenta deve ser evitado. | 97.9% | 0.0% | 48 | 1st |
| 2 | 42 | A titulação de dose de corticoterapia sistémica crónica com base em biomarcadores resulta numa maior redução das agudizações, quando comparado com a titulação da dose baseada apenas em marcadores clínicos. | 52.2% | 6.5% | 46 | Not reached |
| 2 | 43 | A decisão de tratar a asma com CSC deve basear-se na relação benefício/risco dessa terapêutica. | 95.8% | 4.2% | 48 | 1st |
| 2 | 44 | O contínuo desenvolvimento de terapêuticas alternativas para a gestão das agudizações da asma e asma grave são necessários para reduzir a exposição à CS. | 100.0% | 0.0% | 48 | 1st |
| 2 | 45 | A CSC nos asmáticos pode antecipar em décadas o aparecimento de comorbilidades como a DM e a doença cardiovascular em doentes com potencial genético para tal. | 93.5% | 2.2% | 46 | 2nd |
| 3 | 46 | O doente tratado com CSC corre o risco de ficar sob prednisolona a longo prazo, uma vez que pode não se conseguir suspender terapêutica, devido à supressão adrenal. | 67.4% | 23.9% | 46 | Not reached |
| 3 | 47 | A redução abrupta da dose de CSC pode estar associada a sintomas de supressão adrenal, efeito secundário que tem de ser evitado. | 95.8% | 2.1% | 48 | 1st |
| 3 | 48 | Não há diferenças na frequência de eventos adversos entre os corticoides administrados por via intramuscular ou por via oral. | 8.7% | 87.0% | 46 | 2nd |
| 3 | 49 | Os eventos adversos relacionados com o uso da corticoterapia sistémica crónica são dose-dependentes. | 89.1% | 4.3% | 46 | 2nd |
| 3 | 50 | Os eventos adversos relacionados com o uso da corticoterapia sistémica crónica são dose-dependentes e são cumulativos no tempo. | 97.9% | 0.0% | 48 | 1st |
| 3 | 51 | A terapêutica com CS está associada a um aumento nos gastos em saúde, em parte devido à necessidade de resolução de eventos adversos com ela relacionados. | 95.7% | 2.2% | 46 | 2nd |
| 3 | 52 | O uso de CS por curtos períodos de tempo NÃO está associado a eventos adversos graves. | 8.7% | 82.6% | 46 | 3rd |
| 3 | 53 | O uso de CS por curtos períodos de tempo PODE estar associado a eventos adversos graves, particularmente na presença de comorbilidades. | 95.8% | 0.0% | 48 | 1st |
| 3 | 54 | Doentes em uso contínuo de corticoterapia sistémica devem ser monitorizados regularmente no que concerne à avaliação de ganho de peso, diabetes, dislipidemia, hipertensão, glaucoma, osteoporose, cataratas ou patologia neuropsiquiátrica. | 100.0% | 0.0% | 48 | 1st |
| 3 | 55 | Os doentes sob CSC devem realizar densitometria óssea de 2 em 2 anos. | 89.1% | 0.0% | 46 | 2nd |
| 3 | 56 | Os doentes sob CSC devem realizar rastreio oftalmológico anual. | 93.3% | 0.0% | 46 | 2nd |
| 3 | 57 | Os doentes sob CSC devem realizar rastreio da dislipidemia ao fim do primeiro mês e depois a cada 6 a 12 meses. | 87.0% | 6.5% | 46 | 2nd |
| 3 | 58 | Os doentes sob CSC devem realizar rastreio de DM a cada 3 a 6 meses no primeiro ano e depois, anualmente. | 93.8% | 2.1% | 48 | 1st |
| 3 | 59 | Os doentes sob CSC devem realizar rastreio de HTA com a periodicidade de 3 a 6 meses. | 93.8% | 4.2% | 48 | 1st |
| 3 | 60 | Os doentes sob CSC devem realizar avaliação do controlo de peso com a periodicidade de 3 a 6 meses. | 91.7% | 2.1% | 48 | 1st |
| 3 | 61 | Doentes com CSC mantêm indicação para vacina pneumocócica e vacina anti-gripal. | 100.0% | 0.0% | 48 | 1st |
| 3 | 62 | Os doentes sob CSC que iniciem redução de dose, com vista à sua suspensão, devem fazê-lo com redução lenta e progressiva. | 100.0% | 0.0% | 48 | 1st |
| 3 | 63 | Quando atingirem doses fisiológicas, devem realizar doseamento sérico do cortisol e da ACTH. | 82.6% | 0.0% | 46 | 3rd |
| 3 | 64 | A redução de dose de CSC abaixo da dose fisiológica deve ser orientada pelo doseamento de cortisol sérico matinal. | 63.0% | 2.2% | 46 | Not reached |
| 3 | 65 | Na presença de um doseamento de cortisol matinal normal e sintomas de supressão adrenal (fadiga, náuseas, vómitos, diarreia, artralgia, hipotensão, sintomas psiquiátricos), os doentes devem ser referenciados à endocrinologia para estudo complementar. | 93.8% | 2.1% | 48 | 1st |
| *Round in which consensus was obtained. Values of agreement refer to the last round before consensus  Thresholds for both positive or negative agreements were fixed for each round as: >90% (1st round); >85% (2nd round); >80% (3rd round) | | | | | | |

**Table S2. Variation between rounds**

| **Topic** | **Item** | **1st round - agreement** | **1st round - disagreement** | **2nd round - agreement** | **2nd round - disagreement** | **3rd round - agreement** | **3rd round - disagreement** | **Variation 1st - 2nd rounds**  **agreement** | **Variation 1st - 2nd rounds disagreement** | **Variation 2nd - 3rd rounds agreement** | **Variation**  **2nd - 3rd rounds disagreement** |
| --- | --- | --- | --- | --- | --- | --- | --- | --- | --- | --- | --- |
| 1 | 1 | 100% | 0% | - | - | - | - | - | - | - | - |
| 1 | 2 | 100% | 0% | - | - | - | - | - | - | - | - |
| 1 | 3 | 100% | 0% | - | - | - | - | - | - | - | - |
| 1 | 4 | 98% | 2% | - | - | - | - | - | - | - | - |
| 1 | 5 | 58% | 31% | 63% | 30% | 65% | 33% | 5% | -1% | 2% | 2% |
| 1 | 6 | 81% | 13% | 87% | 9% | - | - | 6% | -4% | - | - |
| 1 | 7 | 96% | 0% | - | - | - | - | - | - | - | - |
| 1 | 8 | 67% | 23% | 80% | 13% | 89% | 11% | 14% | -10% | 9% | -2% |
| 1 | 9 | 100% | 0% | - | - | - | - | - | - | - | - |
| 1 | 10 | 81% | 8% | 91% | 2% | - | - | 10% | -6% | - | - |
| 1 | 11 | 100% | 0% | - | - | - | - | - | - | - | - |
| 1 | 12 | 98% | 0% | - | - | - | - | - | - | - | - |
| 1 | 13 | 88% | 10% | 91% | 4% | - | - | 4% | -6% | - | - |
| 1 | 14 | 85% | 4% | 85% | 4% | 96% | 0% | -1% | 0% | 11% | -4% |
| 1 | 15 | 75% | 10% | 85% | 7% | 91% | 4% | 10% | -4% | 7% | -2% |
| 1 | 16 | 92% | 0% | - | - | - | - | - | - | - | - |
| 1 | 17 | 54% | 38% | 76% | 24% | 83% | 17% | 22% | -14% | 7% | -7% |
| 1 | 18 | 81% | 6% | 83% | 7% | 89% | 2% | 1% | 0% | 7% | -4% |
| 1 | 19 | 94% | 4% | - | - | - | - | - | - | - | - |
| 2 | 20 | 100% | 0% | - | - | - | - | - | - | - | - |
| 2 | 21 | 96% | 2% | - | - | - | - | - | - | - | - |
| 2 | 22 | 71% | 13% | 78% | 9% | 83% | 7% | 7% | -4% | 4% | -2% |
| 2 | 23 | 56% | 23% | 61% | 20% | 70% | 13% | 5% | -3% | 9% | -7% |
| 2 | 24 | 88% | 2% | 91% | 2% | - | - | 4% | 0% | - | - |
| 2 | 25 | 63% | 17% | 72% | 13% | 87% | 9% | 9% | -4% | 15% | -4% |
| 2 | 26 | 94% | 4% | - | - | - | - | - | - | - | - |
| 2 | 27 | 73% | 13% | 80% | 11% | 87% | 7% | 8% | -2% | 7% | -4% |
| 2 | 28 | 81% | 8% | 89% | 4% | - | - | 8% | -4% | - | - |
| 2 | 29 | 69% | 15% | 85% | 11% | 89% | 11% | 16% | -4% | 4% | 0% |
| 2 | 30 | 69% | 17% | 83% | 13% | 89% | 11% | 14% | -4% | 6% | -2% |
| 2 | 31 | 52% | 29% | 67% | 24% | 76% | 20% | 15% | -5% | 9% | -4% |
| 2 | 32 | 8% | 75% | 4% | 85% | 2% | 87% | -4% | 10% | -2% | 2% |
| 2 | 33 | 38% | 29% | 37% | 22% | 37% | 20% | -1% | -7% | 0% | -2% |
| 2 | 34 | 77% | 10% | 93% | 7% | - | - | 16% | -4% | - | - |
| 2 | 35 | 90% | 8% | 91% | 7% | - | - | 2% | -2% | - | - |
| 2 | 36 | 94% | 2% | - | - | - | - | - | - | - | - |
| 2 | 37 | 73% | 10% | 85% | 2% | 89% | 2% | 12% | -8% | 4% | 0% |
| 2 | 38 | 96% | 2% | - | - | - | - | - | - | - | - |
| 2 | 39 | 23% | 63% | 22% | 67% | 22% | 70% | -1% | 5% | 0% | 2% |
| 2 | 40 | 81% | 10% | 89% | 7% | - | - | 8% | -4% | - | - |
| 2 | 41 | 98% | 0% | - | - | - | - | - | - | - | - |
| 2 | 42 | 48% | 15% | 52% | 11% | 52% | 7% | 4% | -4% | 0% | -4% |
| 2 | 43 | 96% | 4% | - | - | - | - | - | - | - | - |
| 2 | 44 | 100% | 0% | - | - | - | - | - | - | - | - |
| 2 | 45 | 88% | 6% | 93% | 2% | - | - | 6% | -4% | - | - |
| 3 | 46 | 56% | 25% | 65% | 26% | 67% | 24% | 9% | 1% | 2% | -2% |
| 3 | 47 | 96% | 2% | - | - | - | - | - | - | - | - |
| 3 | 48 | 17% | 75% | 9% | 87% | - | - | -8% | 12% | - | - |
| 3 | 49 | 77% | 8% | 89% | 4% | - | - | 12% | -4% | - | - |
| 3 | 50 | 98% | 0% | - | - | - | - | - | - | - | - |
| 3 | 51 | 88% | 2% | 96% | 2% | - | - | 8% | 0% | - | - |
| 3 | 52 | 23% | 56% | 17% | 65% | 9% | 83% | -6% | 9% | -9% | 17% |
| 3 | 53 | 96% | 0% | - | - | - | - | - | - | - | - |
| 3 | 54 | 100% | 0% | - | - | - | - | - | - | - | - |
| 3 | 55 | 85% | 4% | 89% | 0% | - | - | 4% | -4% | - | - |
| 3 | 56 | 90% | 2% | 93% | 0% | - | - | 4% | -2% | - | - |
| 3 | 57 | 88% | 6% | 87% | 7% | - | - | -1% | 0% | - | - |
| 3 | 58 | 94% | 2% | - | - | - | - | - | - | - | - |
| 3 | 59 | 94% | 4% | - | - | - | - | - | - | - | - |
| 3 | 60 | 92% | 2% | - | - | - | - | - | - | - | - |
| 3 | 61 | 100% | 0% | - | - | - | - | - | - | - | - |
| 3 | 62 | 100% | 0% | - | - | - | - | - | - | - | - |
| 3 | 63 | 65% | 13% | 74% | 4% | 83% | 0% | 9% | -8% | 9% | -4% |
| 3 | 64 | 50% | 21% | 61% | 13% | 63% | 2% | 11% | -8% | 2% | -11% |
| 3 | 65 | 94% | 2% | - | - | - | - | - | - | - | - |
